# Supplementary material for: Association between tumor molecular subtype, clinical stage and axillary pathological response in breast cancer patients undergoing complete pathological remission after neoadjuvant chemotherapy: potential implications for de-escalation of axillary surgery
Source: PubMed Central journal article supplement — Ther Adv Med Oncol. 2021 Feb 26;13:1758835921996673. doi: 10.1177/1758835921996673 (PMC7934036; doi:10.1177/1758835921996673), 2021-02-26
Supplement: sj-pdf-1-tam-10.1177_1758835921996673.pdf [file sj-pdf-1-tam-10.1177_1758835921996673.pdf]

**Supplementary Table S1. Univariate analysis of impact factors for ypN+ in the whole, breast pathological complete remission (pCR) and breast non-pCR population**

| <b>Factors</b>                           | <b>Whole</b>     | <b>Breast pCR</b> | <b>Breast non-pCR</b> |
|------------------------------------------|------------------|-------------------|-----------------------|
| Age ( $\geq 50$ vs $< 50$ )              | 0.738            | 0.456             | 0.979                 |
| Menstruation (post vs premenopausal)     | 0.829            | 0.854             | 0.960                 |
| Clinical stage                           | <b>&lt;0.001</b> | <b>&lt;0.001</b>  | <b>&lt;0.001</b>      |
| cT1-2N0                                  | Ref              | Ref               | Ref                   |
| cT1-2N1                                  | <b>&lt;0.001</b> | <b>&lt;0.001</b>  | <b>&lt;0.001</b>      |
| LABC                                     | <b>&lt;0.001</b> | <b>&lt;0.001</b>  | <b>&lt;0.001</b>      |
| Histology (other invasive vs IDC)        | 0.305            | 0.572             | 0.449                 |
| Tumor grade (III vs I-II)                | <b>0.033</b>     | 0.767             | <b>0.003</b>          |
| ER (positive vs negative)                | <b>&lt;0.001</b> | 0.329             | <b>0.001</b>          |
| PR (positive vs negative)                | <b>&lt;0.001</b> | <b>0.034</b>      | <b>0.002</b>          |
| HER2 (positive vs negative)              | <b>&lt;0.001</b> | <b>0.004</b>      | <b>&lt;0.001</b>      |
| Ki67 ( $\geq 14\%$ vs $< 14\%$ )         | 0.080            | 0.461             | 0.684                 |
| Molecular subtype                        | <b>&lt;0.001</b> | 0.081             | <b>&lt;0.001</b>      |
| Luminal A                                | Ref              | Ref               | Ref                   |
| Luminal B (HER2-)                        | 0.780            | 0.927             | 0.328                 |
| Luminal B (HER2+)                        | <b>0.019</b>     | 0.229             | 0.270                 |
| HER2-amplified                           | <b>0.001</b>     | 0.269             | 0.052                 |
| TNBC                                     | 0.141            | 0.816             | 0.521                 |
| NAC regimens                             | <b>&lt;0.001</b> | 0.459             | <b>&lt;0.001</b>      |
| Containing A                             | Ref              | Ref               | Ref                   |
| Containing T                             | 0.201            | 0.280             | 0.597                 |
| A+T combination                          | <b>0.014</b>     | 0.214             | <b>0.009</b>          |
| Neoadjuvant targeted therapy (Yes vs No) | <b>&lt;0.001</b> | <b>0.017</b>      | <b>&lt;0.001</b>      |
| NAC cycles ( $> 6$ vs 4-6)               | 0.400            | 0.058             | 0.205                 |
| Breast pCR (Yes vs No)                   | <b>&lt;0.001</b> | /                 | /                     |

Abbreviations: IDC, invasive ductal carcinoma; ER, estrogen receptor; PR, progesterone receptor; HER2, human epidermal growth factor receptor 2; TNBC, triple negative breast cancer; NAC, neoadjuvant chemotherapy; A, anthracyclines; T, taxanes; LABC, locally advanced breast cancer; pCR, pathological complete remission.
