# Supplementary material for: Association between tumor molecular subtype, clinical stage and axillary pathological response in breast cancer patients undergoing complete pathological remission after neoadjuvant chemotherapy: potential implications for de-escalation of axillary surgery
Source: PubMed Central journal article supplement — Ther Adv Med Oncol. 2021 Feb 26;13:1758835921996673. doi: 10.1177/1758835921996673 (PMC7934036; doi:10.1177/1758835921996673), 2021-02-26
Supplement: sj-pdf-2-tam-10.1177_1758835921996673.pdf [file sj-pdf-2-tam-10.1177_1758835921996673.pdf]

**Supplementary Table S2. Multivariate analysis of impact factors for ypN+ in breast non-pathological complete remission (pCR) patients**

| <b>Factors</b>                      | <b>OR</b> | <b>95% CI</b> | <b>P-value</b>   |
|-------------------------------------|-----------|---------------|------------------|
| <b>Clinical stage</b>               |           |               | <b>&lt;0.001</b> |
| cT1-2N0                             | 1         |               |                  |
| cT1-2N1                             | 5.51      | 3.71-8.16     | <b>&lt;0.001</b> |
| LABC                                | 10.63     | 6.76-16.72    | <b>&lt;0.001</b> |
| <b>ER</b>                           |           |               | 0.131            |
| Negative                            | 1         |               |                  |
| Positive                            | 1.31      | 0.92-1.86     |                  |
| <b>PR</b>                           |           |               | 0.515            |
| Negative                            | 1         |               |                  |
| Positive                            | 0.85      | 0.52-1.39     |                  |
| <b>HER2</b>                         |           |               | 0.353            |
| Negative                            | 1         |               |                  |
| Positive                            | 0.83      | 0.56-1.42     |                  |
| <b>Molecular subtypes</b>           |           |               | 0.634            |
| Luminal A-like                      | 1         |               |                  |
| Luminal B (HER2-)                   | 1.19      | 0.62-2.30     | 0.599            |
| Luminal B (HER2+)                   | 0.85      | 0.41-1.73     | 0.650            |
| HER2-amplified                      | 1.43      | 0.33-6.27     | 0.638            |
| TNBC                                | 1.31      | 0.30-5.74     | 0.718            |
| <b>Grade</b>                        |           |               | 0.065            |
| I-II                                | 1         |               |                  |
| III                                 | 1.38      | 0.98-1.23     |                  |
| <b>NAC regimens</b>                 |           |               | 0.090            |
| Containing A                        | 1         |               |                  |
| Containing T                        | 0.67      | 0.35-1.28     | 0.221            |
| A+T combination                     | 1.13      | 0.68-1.87     | 0.641            |
| <b>Neoadjuvant targeted therapy</b> |           |               | <b>0.001</b>     |
| Yes                                 | 1         |               |                  |
| No                                  | 2.15      | 1.39-3.32     |                  |

Abbreviations: OR, odds ratio; CI, confidence interval; ER, estrogen receptor; PR, progesterone receptor; HER2, human epidermal growth factor receptor 2; TNBC, triple negative breast cancer; NAC, neoadjuvant chemotherapy; A, anthracyclines; T, taxanes; pCR, pathological complete remission.
