# Supplementary material for: Association between tumor molecular subtype, clinical stage and axillary pathological response in breast cancer patients undergoing complete pathological remission after neoadjuvant chemotherapy: potential implications for de-escalation of axillary surgery
Source: PubMed Central journal article supplement — Ther Adv Med Oncol. 2021 Feb 26;13:1758835921996673. doi: 10.1177/1758835921996673 (PMC7934036; doi:10.1177/1758835921996673), 2021-02-26
Supplement: sj-pdf-3-tam-10.1177_1758835921996673.pdf [file sj-pdf-3-tam-10.1177_1758835921996673.pdf]

**Supplementary Table S3. Axillary lymph node involvement stratified by clinical stage in patients with breast pathological complete remission (pCR) and non-pCR**

|                        | Breast pCR               |          |         |         | Breast non-pCR           |           |           |           |
|------------------------|--------------------------|----------|---------|---------|--------------------------|-----------|-----------|-----------|
|                        | Number of involved nodes |          |         |         | Number of involved nodes |           |           |           |
|                        | 0                        | 1-3      | 4-9     | >9      | 0                        | 1-3       | 4-9       | >9        |
| Whole population       | 331(76.1)                | 72(16.6) | 21(4.8) | 11(2.5) | 586(37.5)                | 424(27.1) | 314(20.1) | 240(15.3) |
| cT1-2N0                | 88(93.6)                 | 3(3.2)   | 3(3.2)  | 0(0.0)  | 257(70.8)                | 58(16.0)  | 29(8.0)   | 19(5.2)   |
| cT1-2N1                | 159(74.3)                | 38(17.8) | 11(5.1) | 6(2.8)  | 192(28.7)                | 226(33.7) | 156(23.3) | 96(14.3)  |
| LABC                   | 84(66.1)                 | 31(24.4) | 7(5.5)  | 5(3.9)  | 137(25.8)                | 140(26.4) | 129(24.3) | 125(23.5) |
| Luminal A-like         | 9(69.2)                  | 2(15.4)  | 2(15.4) | 0(0.0)  | 37(36.3)                 | 26(25.5)  | 27(26.5)  | 12(11.8)  |
| cT1-2N0                | 6(85.7)                  | 0(0.0)   | 1(14.3) | 0(0.0)  | 19(73.1)                 | 4(15.4)   | 3(11.5)   | 0(0.0)    |
| cT1-2N1                | 3(50.0)                  | 2(33.3)  | 1(16.7) | 0(0.0)  | 12(27.9)                 | 14(32.6)  | 11(25.6)  | 6(14.0)   |
| LABC                   | 0(0.0)                   | 0(0.0)   | 0(0.0)  | 0(0.0)  | 6(18.2)                  | 8(24.2)   | 13(39.4)  | 6(18.2)   |
| Luminal B-like (HER2-) | 112(70.4)                | 33(20.8) | 9(5.7)  | 5(3.1)  | 220(31.4)                | 201(28.7) | 159(22.7) | 120(17.1) |
| cT1-2N0                | 33(89.2)                 | 2(5.4)   | 2(5.4)  | 0(0.0)  | 85(59.0)                 | 32(22.2)  | 17(11.8)  | 10(6.9)   |
| cT1-2N1                | 59(71.1)                 | 17(20.5) | 4(4.8)  | 3(3.6)  | 75(23.8)                 | 110(34.9) | 80(25.4)  | 50(15.9)  |
| LABC                   | 20(51.3)                 | 14(35.9) | 3(7.7)  | 2(5.1)  | 60(24.9)                 | 59(24.5)  | 62(25.7)  | 60(24.9)  |
| Luminal B-like (HER2+) | 89(83.2)                 | 13(12.1) | 2(1.9)  | 3(2.8)  | 140(42.4)                | 91(27.6)  | 61(18.5)  | 38(11.5)  |
| cT1-2N0                | 19(100.0)                | 0(0.0)   | 0(0.0)  | 0(0.0)  | 70(83.3)                 | 9(10.7)   | 2(2.4)    | 3(3.6)    |
| cT1-2N1                | 46(83.6)                 | 6(10.9)  | 1(1.8)  | 2(3.6)  | 43(30.5)                 | 47(33.3)  | 39(27.7)  | 12(8.5)   |
| LABC                   | 24(72.7)                 | 7(21.2)  | 1(3.0)  | 1(3.0)  | 27(25.7)                 | 35(33.3)  | 20(19.0)  | 23(21.9)  |
| HER2-amplified         | 66(82.5)                 | 6(7.5)   | 5(6.3)  | 3(3.8)  | 97(48.0)                 | 51(25.2)  | 30(14.9)  | 24(11.9)  |
| cT1-2N0                | 14(100.0)                | 0(0.0)   | 0(0.0)  | 0(0.0)  | 42(82.4)                 | 4(7.8)    | 4(7.8)    | 1(2.0)    |
| cT1-2N1                | 25(78.1)                 | 3(9.4)   | 3(9.4)  | 1(3.1)  | 32(42.1)                 | 25(32.9)  | 9(11.8)   | 10(13.2)  |
| LABC                   | 27(79.4)                 | 3(8.8)   | 2(5.9)  | 2(5.9)  | 23(30.7)                 | 22(29.3)  | 17(22.7)  | 13(17.3)  |

|         |          |          |        |        |          |          |          |          |
|---------|----------|----------|--------|--------|----------|----------|----------|----------|
| TNBC    | 55(72.4) | 18(23.7) | 3(3.9) | 0(0.0) | 92(40.0) | 55(23.9) | 37(16.1) | 46(20.0) |
| cT1-2N0 | 16(94.1) | 1(5.9)   | 0(0.0) | 0(0.0) | 41(70.7) | 9(15.5)  | 3(5.2)   | 5(8.6)   |
| cT1-2N1 | 26(68.4) | 10(26.3) | 2(5.3) | 0(0.0) | 30(31.6) | 30(31.6) | 17(17.9) | 18(18.9) |
| LABC    | 13(61.9) | 7(33.3)  | 1(4.8) | 0(0.0) | 21(27.3) | 16(20.8) | 17(22.1) | 23(29.9) |

Abbreviations: LABC, locally advanced breast cancer; HER2, human epidermal growth factor receptor 2; TNBC, triple negative breast cancer; pCR, pathological complete remission.
