# Supplementary material for: Association between tumor molecular subtype, clinical stage and axillary pathological response in breast cancer patients undergoing complete pathological remission after neoadjuvant chemotherapy: potential implications for de-escalation of axillary surgery
Source: PubMed Central journal article supplement — Ther Adv Med Oncol. 2021 Feb 26;13:1758835921996673. doi: 10.1177/1758835921996673 (PMC7934036; doi:10.1177/1758835921996673), 2021-02-26
Supplement: sj-pdf-4-tam-10.1177_1758835921996673.pdf [file sj-pdf-4-tam-10.1177_1758835921996673.pdf]

**Supplementary Table S4. Pathologic axillary node status stratified by clinical stage and molecular subtype between patients with breast pathological complete remission (pCR) (ypT0) and non-pCR Response in breast**

|                        | pCR         |             | non-pCR     |             |
|------------------------|-------------|-------------|-------------|-------------|
|                        | ypN0 (N, %) | ypN+ (N, %) | ypN0 (N, %) | ypN+ (N, %) |
| Whole population       | 225(78.4)   | 62(21.6)    | 692(40.4)   | 1020(59.6)  |
| cT1-2N0                | 55(94.8)    | 3(5.2)      | 290(72.7)   | 109(27.3)   |
| cT1-2N1                | 118(78.7)   | 32(21.3)    | 233(31.7)   | 501(68.3)   |
| LABC                   | 52(65.8)    | 27(34.2)    | 169(29.2)   | 410(70.8)   |
| Luminal A-like         | 5(55.6)     | 4(44.4)     | 41(38.7)    | 65(61.3)    |
| cT1-2N0                | 4(80.0)     | 1(20.0)     | 21(75.0)    | 7(25.0)     |
| cT1-2N1                | 1(25.0)     | 3(75.0)     | 14(31.1)    | 31(68.9)    |
| LABC                   | 0           | 0           | 6(18.2)     | 27(81.8)    |
| Luminal B-like (HER2-) | 76(78.4)    | 21(21.6)    | 256(33.6)   | 506(66.4)   |
| cT1-2N0                | 18(94.7)    | 1(5.3)      | 100(61.7)   | 62(38.3)    |
| cT1-2N1                | 44(83.0)    | 9(17.0)     | 90(26.1)    | 255(73.9)   |
| LABC                   | 14(56.0)    | 11(44.0)    | 66(25.9)    | 189(74.1)   |
| Luminal B-like (HER2+) | 57(85.1)    | 10(14.9)    | 172(46.5)   | 198(53.5)   |
| cT1-2N0                | 12(100.0)   | 0(0.0)      | 77(84.6)    | 44(15.4)    |
| cT1-2N1                | 31(86.1)    | 5(13.9)     | 58(36.3)    | 102(63.7)   |
| LABC                   | 14(73.7)    | 5(26.3)     | 37(31.1)    | 82(68.9)    |
| HER2-amplified         | 42(85.7)    | 7(14.3)     | 121(51.9)   | 112(48.1)   |
| cT1-2N0                | 9(100.0)    | 0(0.0)      | 47(83.9)    | 9(16.1)     |
| cT1-2N1                | 19(82.6)    | 4(17.4)     | 38(44.7)    | 47(55.3)    |
| LABC                   | 14(82.4)    | 3(17.6)     | 36(39.1)    | 56(60.9)    |
| TNBC                   | 45(69.2)    | 20(30.8)    | 102(42.3)   | 139(57.7)   |
| cT1-2N0                | 12(92.3)    | 1(7.7)      | 45(72.6)    | 17(27.4)    |
| cT1-2N1                | 23(67.6)    | 11(32.4)    | 33(33.3)    | 66(66.7)    |
| LABC                   | 10(55.6)    | 8(44.4)     | 24(30.0)    | 56(70.0)    |

Abbreviations: LABC, locally advanced breast cancer; HER2, human epidermal growth factor receptor 2; TNBC, triple negative breast cancer; pCR, pathological complete remission.
