# Supplementary material for: Association between tumor molecular subtype, clinical stage and axillary pathological response in breast cancer patients undergoing complete pathological remission after neoadjuvant chemotherapy: potential implications for de-escalation of axillary surgery
Source: PubMed Central journal article supplement — Ther Adv Med Oncol. 2021 Feb 26;13:1758835921996673. doi: 10.1177/1758835921996673 (PMC7934036; doi:10.1177/1758835921996673), 2021-02-26
Supplement: sj-pdf-5-tam-10.1177_1758835921996673.pdf [file sj-pdf-5-tam-10.1177_1758835921996673.pdf]

**Supplementary Table.S5 Adjuvant treatment for patients after surgery\*.**

| Items              |                 | Chemotherapy | Radiation  | Targeted   | Endocrine  |
|--------------------|-----------------|--------------|------------|------------|------------|
|                    |                 | No. (%)      | No. (%)    | therapy    | therapy    |
|                    |                 |              |            | No. (%)    | No. (%)    |
| Molecular subtypes | Luminal (HER2-) | 317(45.0%)   | 455(64.5%) | 15(2.1%)   | 511(72.5%) |
|                    | HER2+           | 194(35.0%)   | 330(59.6%) | 381(68.8%) | 209(37.7%) |
|                    | TNBC            | 162(59.3%)   | 182(66.7%) | 4(1.5%)    | 12(4.4%)   |
|                    | P value         | <0.001       | 0.078      | <0.001     | <0.001     |
| Clinical stages    | cT1-2N0         | 183(47.4%)   | 153(39.6%) | 82(21.2%)  | 160(41.5%) |
|                    | cT1-2N1         | 296(44.0%)   | 444(66.0%) | 175(26.0%) | 339(50.4%) |
|                    | LABC            | 194(41.0%)   | 370(78.2%) | 143(30.2%) | 233(49.3%) |
|                    | P value         | 0.171        | <0.001     | 0.012      | 0.015      |
| NAT cycles         | 4-6             | 527(57.8%)   | 535(58.7%) | 188(20.6%) | 421(46.2%) |
|                    | >6              | 146(23.5%)   | 432(69.6%) | 212(34.1%) | 311(50.1%) |
|                    | P value         | <0.001       | <0.001     | <0.001     | 0.137      |

\*Adjuvant treatment data was available for 1532 patients.

Abbreviations: HER2, human epidermal growth factor receptor 2; TNBC, triple negative breast cancer; NAT, neoadjuvant therapy.
