# Supplementary material for: Association between tumor molecular subtype, clinical stage and axillary pathological response in breast cancer patients undergoing complete pathological remission after neoadjuvant chemotherapy: potential implications for de-escalation of axillary surgery
Source: PubMed Central journal article supplement — Ther Adv Med Oncol. 2021 Feb 26;13:1758835921996673. doi: 10.1177/1758835921996673 (PMC7934036; doi:10.1177/1758835921996673), 2021-02-26
Supplement: sj-pdf-6-tam-10.1177_1758835921996673.pdf [file sj-pdf-6-tam-10.1177_1758835921996673.pdf]

**Supplementary Table.S6 Multivariate analysis of impact factors on adjuvant chemotherapy and radiotherapy.**

| Adjuvant chemotherapy* |                          |      |           |         |
|------------------------|--------------------------|------|-----------|---------|
| Factor                 |                          | OR   | 95%CI     | P-value |
| Molecular subtypes     | HER2+ vs Luminal (HER2-) | 0.96 | 0.71-1.29 | 0.774   |
|                        | TNBC vs Luminal (HER2-)  | 2.00 | 1.46-2.74 | <0.001  |
| NAT cycles             | > 6 vs 4-6               | 0.30 | 0.23-0.39 | <0.001  |
| Adjuvant radiotherapy# |                          |      |           |         |
| Factor                 |                          | OR   | 95%CI     | P-value |
| Clinical stages        | cT1-2N1 vs cT1-2N0       | 2.10 | 1.58-2.79 | <0.001  |
|                        | LABC vs cT1-2N0          | 3.73 | 2.70-5.17 | <0.001  |

\*Adjusted by neoadjuvant chemotherapy, neoadjuvant targeted therapy, axillary surgery, breast pCR status, ypN0 status (P value < 0.05 in the univariate analysis).

# Adjusted by age, histology, neoadjuvant chemotherapy, NAT cycles, breast surgery, axillary surgery, ypN0 status (P value < 0.05 in the univariate analysis).

Abbreviations: HER2, human epidermal growth factor receptor 2; TNBC, triple negative breast cancer; NAT, neoadjuvant therapy.
